# Supplementary material for: Nicotine Changes Airway Epithelial Phenotype and May Increase the SARS-COV-2 Infection Severity
Source: PubMed Central journal article supplement (PMC7794754; doi:10.3390/molecules26010101), 2020-12-28
Supplement: molecules-26-00101-s001.pdf [file molecules-26-00101-s001.pdf]

## Supplementary Figures

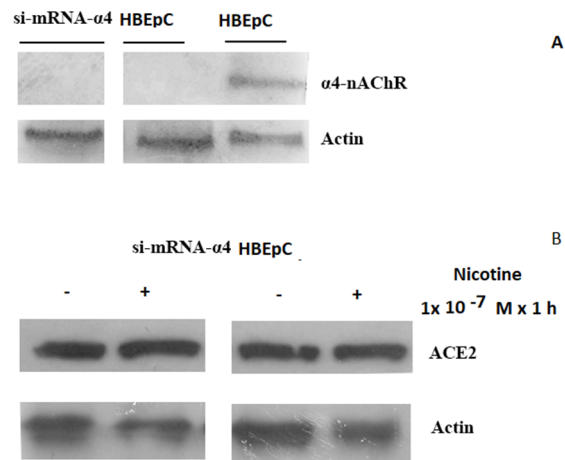

**Figure S1.** Expression of  $\alpha 4$ -nAChR and ACE2 in HBEpC in si-mRNA- $\alpha 4$ -HBEpC after treatment for 1 h with Nicotine  $1 \times 10^{-7}$  M. **A:** Expression of  $\alpha 4$ -nAChR on wild type HBEpC and on si-mRNA- $\alpha 4$ -HBEpC. **B** expression of ACE2.

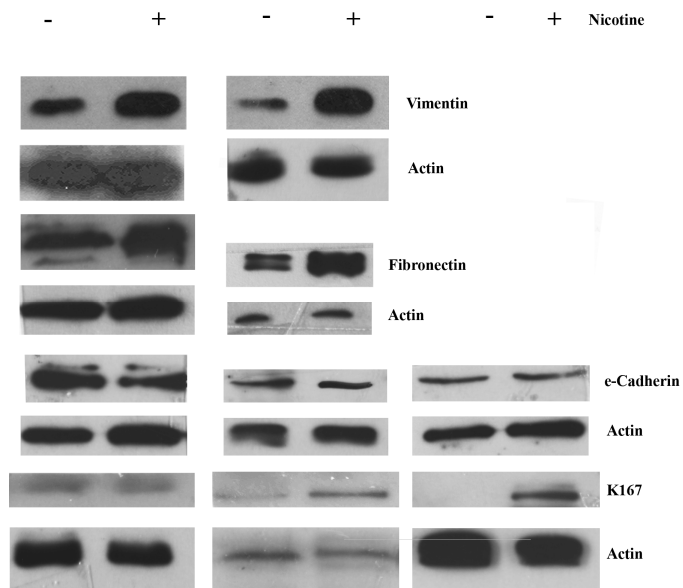

**Figure S2.** Western blot raw data.

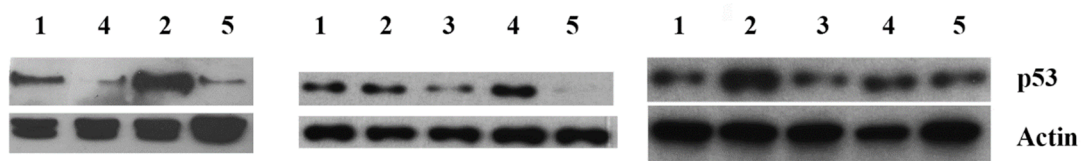

1 CTRL

2 positive control H<sub>2</sub>O<sub>2</sub> 400 μM for 1 h

3. Nicotine 1 × 10<sup>-7</sup> M for 1 h

4 Nicotine 1 × 10<sup>-7</sup> M for 24 h

5 Nicotine 1 × 10<sup>-7</sup> M for 48 h
